# Supplementary material for: Altered gene expression linked to germline dysfunction following exposure of Caenorhabditis elegans to DEET
Source: PubMed Central journal article supplement — iScience. 2024 Jan 4;27(1):108699. doi: 10.1016/j.isci.2023.108699 (PMC10829882; doi:10.1016/j.isci.2023.108699), 2024-01-04
Supplement: mmc1.pdf [file mmc1.pdf]

**Supplemental information**

**Altered gene expression linked  
to germline dysfunction following exposure  
of *Caenorhabditis elegans* to DEET**

**Nara Shin, Laura I. Lascarez-Lagunas, Ayana L. Henderson, Marina Martínez-García, Rajendiran Karthikraj, Victor Barrera, Shannan Ho Sui, Kurunthachalam Kannan, and Mónica P. Colaiácovo**

## SUPPLEMENTAL FIGURES

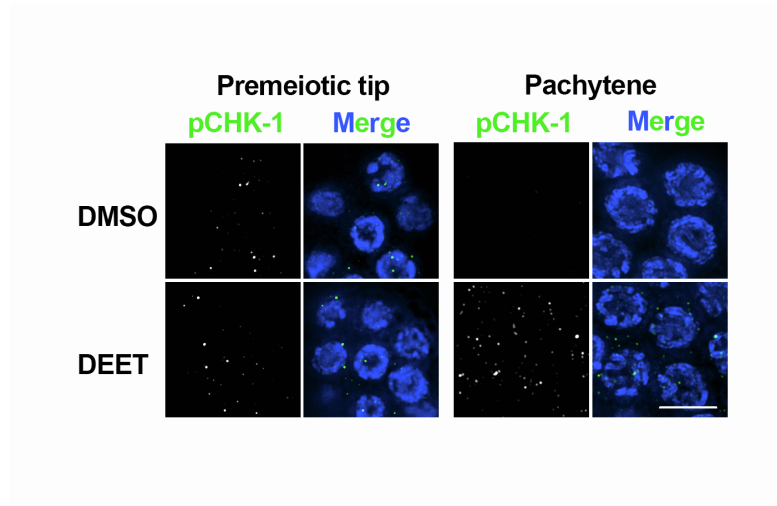

**Supplemental Figure 1. DEET exposure leads to CHK-1 activation. Related to Figure 2E.** High-resolution images of premeiotic tip and mid pachytene nuclei from whole-mounted gonads immunostained for phosphorylated CHK-1 (pCHK-1; green) and co-stained with DAPI (blue). Scale bar, 5  $\mu$ m.

Supplemental Figure 2

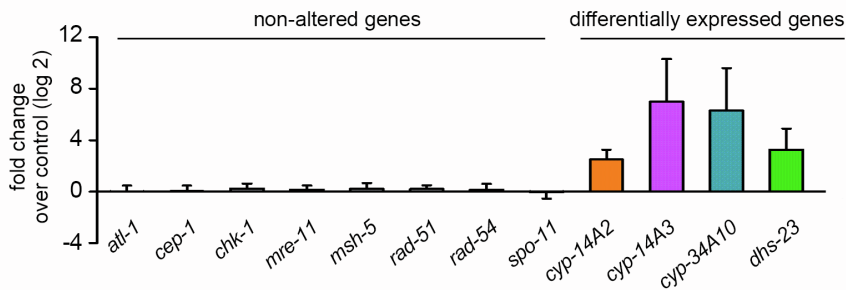

**Supplemental Figure 2. RNA-sequencing validation by quantitative RT-PCR.**

**Related to Figure 4.** 8 genes involved in DSB formation (*spo-11*), DSB repair (*mre-11*, *msh-5*, *rad-51*, and *rad-54*), and DNA damage response (*atl-1*, *cep-1*, and *chk-1*) for which no change in expression was observed, and 4 DE genes, were examined by qRT-PCR see data S1J. Each analysis was performed with technical triplicates and normalized to *gpd-1* (GAPDH). Gene expression level change relative to vehicle alone is depicted in log<sub>2</sub> scale with SEM. Only DE genes show gene expression changes.

**Table S1. Primers utilized for quantitative RT-PCR analysis. Related to STAR Methods.**

| #  | Primer pair      | F sequence           | R sequence            |
|----|------------------|----------------------|-----------------------|
| 1  | <i>atl-1</i>     | cgtcgaaccttcgtctctc  | gcattctcctgcgtttctc   |
| 2  | <i>cep-1</i>     | ttccgacgcaagtagtctcc | ccgttgcattgaacaacac   |
| 3  | <i>chk-1</i>     | gtctggctgtctggattgt  | ttgctgatccatcccatgta  |
| 4  | <i>mre-11</i>    | ctgtttggaagcacagcaa  | ttgaatgctcgaacaagacg  |
| 5  | <i>msh-5</i>     | ccccaaaacagctttcata  | ggcgtcttgaatggatcact  |
| 6  | <i>rad-51</i>    | ccaggctgatgctaaaaagc | ttcggcttctggtaaattgg  |
| 7  | <i>rad-54</i>    | cgtcttcgaatgtggatcg  | gtcgtttcttcggcttcag   |
| 8  | <i>spo-11</i>    | tggacctacgaaagaattgc | tgatcgatgggaaacgatg   |
| 9  | <i>cyp-14A2</i>  | ccactcccattcattggaaa | tgtccataatgtgaagcatgg |
| 10 | <i>cyp-14A3</i>  | ccactaccgcagttgtct   | ggacgattagcacggtgat   |
| 11 | <i>cyp-34A10</i> | ggctcccaaaaggacctact | acggcgcttctaactgat    |
| 12 | <i>dhs-23</i>    | gcatcgggacaagatgaagt | cagtcaaaagagcaccagca  |
